# Supplementary material for: Does the cognitive architecture of simplex and multiplex ASD families differ?
Source: Springer Nature journal article supplement (doi:10.1007/s10803-015-2572-9), 2015-09-04
Supplement: MOESM2 [file 798170]

**SUPPLEMENTARY TABLE 2.** Means and standard errors of the **untransformed** task variables for SPX and MPX probands, their unaffected siblings and normal controls (corrected for age and sex)

|                                   |                                                 | Controls (c)   |             | ASD probands  |               | unaffected siblings |  |
|-----------------------------------|-------------------------------------------------|----------------|-------------|---------------|---------------|---------------------|--|
|                                   |                                                 | M (se)         | Family type | M (se)        | M (se)        |                     |  |
| VIQ                               |                                                 | 109.3 (1.8)    | SPX         | 93.5 (2.3)    | 105.5 (21)    |                     |  |
|                                   |                                                 |                | MPX         | 96.4 (2.0)    | 99.0 (2.5)    |                     |  |
| PIQ                               |                                                 | 108.2 (1.9)    | SPX         | 98.9 (2.4)    | 107.0 (2.2)   |                     |  |
|                                   |                                                 |                | MPX         | 102.5 (2.1)   | 105.8 (2.6)   |                     |  |
| Face recognition                  | Mean reaction time (ms) <sup>a</sup>            | 17734.8 (42.9) | SPX         | 2111.1 (66.8) | 1830.1 (55.2) |                     |  |
|                                   |                                                 |                | MPX         | 1938.2 (50.6) | 1770.0 (69.6) |                     |  |
| Identification of facial emotions | Mean reaction time (ms) <sup>a</sup>            | 969.4 (18.4)   | SPX         | 1073.3 (26.0) | 964.7 (22.9)  |                     |  |
|                                   |                                                 |                | MPX         | 1019.0 (20.9) | 1003.6 (28.0) |                     |  |
| Affective prosody                 | Mean reaction time (ms) <sup>a</sup>            | 2949.3 (63.9)  | SPX         | 3539.1 (84.9) | 3384.2 (72.6) |                     |  |
|                                   |                                                 |                | MPX         | 3424.6 (68.4) | 3321.7 (93.3) |                     |  |
| Inhibition                        | Accuracy (% false alarms-% misses) <sup>b</sup> | 20.5 (1.4)     | SPX         | 25.8 (2.1)    | 22.0 (1.8)    |                     |  |
|                                   |                                                 |                | MPX         | 24.1 (1.7)    | 21.2 (2.3)    |                     |  |
| Verbal WM                         | Max. span backwards <sup>c</sup>                | 4.2 (0.1)      | SPX         | 3.7 (0.2)     | 4.1 (0.1)     |                     |  |
|                                   |                                                 |                | MPX         | 3.8 (0.1)     | 4.2 (0.2)     |                     |  |
| Visual WM                         | % correct identified targets <sup>d</sup>       | 56.2 (2.1)     | SPX         | 51.2 (2.9)    | 58.8 (2.6)    |                     |  |
|                                   |                                                 |                | MPX         | 52.2 (2.3)    | 59.8 (3.1)    |                     |  |
| Set shifting % errors             | Accuracy (% errors) <sup>e</sup>                | 7.0 (0.7)      | SPX         | 8.6 (1.1)     | 7.3 (0.9)     |                     |  |
|                                   |                                                 |                | MPX         | 9.2 (0.8)     | 7.7 (1.2)     |                     |  |

*Note.* ASD = autism spectrum disorders, SPX = simplex, MPX = multiplex, M = mean, se = standard error, WM = working memory.

<sup>a</sup>higher scores represent slower reaction times

<sup>b</sup>higher mean score represents less accurate

<sup>c</sup>higher maximum span represents better verbal working memory

<sup>d</sup>higher mean score represent more accurate

<sup>e</sup>higher mean score represents more errors
